# Supplementary material for: The influence of the internet on choices about older adults’ health and well-being
Source: PubMed Central journal article supplement (PMC11095947; doi:10.1590/0034-7167-2023-0321), 2024-05-13
Supplement: 0034-7167-reben-77-01-e20230321-suppl01.pdf [file 0034-7167-reben-77-01-e20230321-suppl01.pdf]

| Date       | A-1. Qual sua idade? Em anos completos: | A-2. Quais as iniciais de seu nome: | A-4. Sexo: | A-5. Estado Civil atual: | A-6. Escolaridade | A-8. Atualmente o sr(a) mora:                                       | A-11. Caso esteja aposentado(a), com que idade se aposentou em anos completos: | A-12. Qual o motivo de sua aposentadoria? | A-13. Qual sua renda mensal? Reais: | A-13. Qual sua principal fonte de renda: | B- 01 Faz uso de cigarros e/ou charutos? | B- 02. Faz uso de medicamentos? | B- 03. Se respondeu sim na pergunta anterior que tipo: |
|------------|-----------------------------------------|-------------------------------------|------------|--------------------------|-------------------|---------------------------------------------------------------------|--------------------------------------------------------------------------------|-------------------------------------------|-------------------------------------|------------------------------------------|------------------------------------------|---------------------------------|--------------------------------------------------------|
| 2017-05-16 | 62                                      | JBS                                 | Feminino   | Casado(a)                | Ensino Superior   | Outros                                                              | Entre 40 e 52 Simanos                                                          |                                           |                                     | divide aposentadori                      | responsabilidades                        | Sim                             |                                                        |
| 2017-10-13 | 64                                      | ACB                                 | Feminino   | Solteiro(a)              | Ensino Superior   | com filho(s)                                                        | Entre 40 e 52 Simanos                                                          |                                           |                                     | aposentadoria                            |                                          | Sim                             | 1,2                                                    |
| 2017-12-03 | 61                                      | MGDR                                | Feminino   | Solteiro(a)              | Ensino Superior   | Outros                                                              | Entre 53 a 60 Simanos                                                          |                                           |                                     | divide aposentadori                      | responsabilidades                        | Sim                             | 1,5                                                    |
| 2018-02-11 | 77                                      | VS                                  | Feminino   |                          |                   | sozinho                                                             | Entre 53 a 60 Simanos                                                          | idade                                     |                                     | aposentadoria e outros                   |                                          | Sim                             | 1,2                                                    |
| 2018-02-19 | 65                                      | EC                                  | Feminino   | Divorciado(a)            |                   | sozinho                                                             | Entre 53 a 60 Simanos                                                          | idade                                     |                                     |                                          |                                          | Sim                             | 1,7                                                    |
| 2018-02-20 | 73                                      | DBS                                 | Feminino   | Casado(a)                | Ensino Superior   | Professor(a)                                                        | Entre 40 e 52 Simanos                                                          |                                           |                                     | divide aposentadori                      | responsabilidades                        | Sim                             | 1,5                                                    |
| 2018-02-20 | 62                                      | RSV                                 | Feminino   | Casado(a)                | Ensino Superior   | Outros                                                              | Entre 40 e 52 Simanos                                                          |                                           |                                     | divide aposentadori                      | responsabilidades                        | Sim                             | 1,5                                                    |
| 2018-02-21 | 73                                      | MRRP                                | Feminino   | Casado(a)                | Ensino Superior   | Professor(a)                                                        | Entre 53 a 60 Simanos                                                          |                                           |                                     | divide aposentadori                      | responsabilidades                        | Sim                             | 1,2                                                    |
| 2018-02-24 | 71                                      | C S                                 | Feminino   | Divorciado(a)            | Ensino Superior   | sozinho                                                             | Acima de 60 Simanos                                                            |                                           |                                     | aposentadoria                            |                                          | Sim                             | 1,2                                                    |
| 2018-03-07 | 60                                      | VAX                                 | Feminino   | Divorciado(a)            | Ensino Superior   | com filho(s)                                                        | Outros                                                                         |                                           |                                     |                                          |                                          | Sim                             | 1,2                                                    |
| 2018-03-11 | 70                                      | GAS                                 | Feminino   | Solteiro(a)              | Ensino Superior   | cedida                                                              | Entre 53 a 60 Simanos                                                          |                                           |                                     | aposentadoria e outros                   |                                          | Sim                             | 1,5                                                    |
| 2017-04-30 | 74                                      | NPB                                 | Feminino   |                          |                   | sozinho                                                             | Acima de 60 Simanos                                                            | idade                                     |                                     |                                          |                                          | Sim                             |                                                        |
| 2017-05-08 | 60                                      | d f                                 | Feminino   | Divorciado(a)            | Ensino Superior   | alugada com filho(s)                                                | Entre 53 a 60 Simanos                                                          |                                           |                                     |                                          |                                          | Sim                             |                                                        |
| 2018-02-25 | 62                                      | OSGS                                | Masculino  | Casado(a)                |                   | Outros                                                              | Entre 53 a 60 Simanos                                                          |                                           |                                     | aposentadoria e outros                   |                                          | Sim                             |                                                        |
| 2017-11-16 | 69                                      | R F R                               | Feminino   | Casado(a)                | Ensino Superior   | alugada                                                             | Entre 53 a 60 Simanos                                                          |                                           |                                     | aposentadoria                            | sim                                      | Sim                             |                                                        |
| 2018-03-25 | 63                                      | MCTR                                | Feminino   | Divorciado(a)            |                   | sozinho                                                             | Entre 40 e 52 Simanos                                                          | aposentadoria especial                    |                                     |                                          |                                          | Sim                             | 2,4,7,8                                                |
| 2018-02-16 | 73                                      | M z                                 | Feminino   |                          |                   | sozinho                                                             | Entre 53 a 60 Simanos                                                          | idade                                     |                                     | aposentadoria e outros                   | sim                                      | Sim                             | 2,4,7,8                                                |
| 2018-03-01 | 67                                      | JB                                  | Feminino   | Solteiro(a)              | Ensino Superior   | Outros                                                              | Entre 53 a 60 anos                                                             |                                           |                                     | aposentadoria e outros                   |                                          | Sim                             | 7- Dor, 12- Outros 7,8,12                              |
| 2018-02-10 | 67                                      | M V                                 | Feminino   |                          | Ensino Superior   | com filho(s)                                                        | Entre 53 a 60 Simanos                                                          |                                           |                                     | aposentadoria                            |                                          | Sim                             | 2,4,8,9                                                |
| 2017-10-13 | 65                                      | Hpa                                 | Feminino   | Casado(a)                |                   | com companheiros(a), filho(s) e neto(s) com companheiro(a) e filhos |                                                                                |                                           |                                     | outros                                   | divide responsabilidades                 | Sim                             | 12- Outros                                             |
| 2017-11-10 | 62                                      | MAS                                 | Feminino   | Casado(a)                |                   |                                                                     |                                                                                |                                           |                                     | divide responsabilidades                 |                                          | Sim                             | 12- Outros                                             |
| 2017-11-21 | 60                                      | Mc                                  | Feminino   | Solteiro(a)              | Ensino Superior   | com netos                                                           |                                                                                |                                           |                                     |                                          |                                          | Sim                             | 12- Outros                                             |
| 2017-05-06 | 68                                      | E.S.                                | Feminino   |                          |                   | sozinho                                                             | Acima de 60 Simanos                                                            | idade                                     |                                     | aposentadoria                            |                                          | Sim                             | 12- Outros                                             |
| 2017-12-09 | 72                                      | CLFS                                | Feminino   | Casado(a)                | Ensino Superior   | Professor(a)                                                        | Entre 40 e 52 Simanos                                                          |                                           |                                     | aposentadori                             | divide e outros responsabilidades        | Sim                             | 2,9,12                                                 |
| 2017-10-02 | 76                                      | VS                                  | Feminino   |                          |                   | sozinho                                                             | Acima de 60 Simanos                                                            | idade                                     |                                     | aposentadoria e outros                   |                                          | Sim                             | 1,2,10                                                 |
| 2017-05-20 | 62                                      | J.N.S.L.                            | Feminino   | Casado(a)                | Ensino Superior   | Professor(a)                                                        | Entre 53 a 60 Simanos                                                          | aposentadoria especial                    |                                     | aposentadoria                            |                                          | Sim                             | 2,4,8                                                  |
| 2017-10-13 | 70                                      | M.M.P.                              | Feminino   | Casado(a)                |                   | Outros                                                              | Acima de 60 Simanos                                                            | idade                                     |                                     | divide aposentadori                      | responsabilidades                        | Sim                             | 2,8                                                    |
| 2017-11-28 | 62                                      | JBCC                                | Masculino  | Casado(a)                | Ensino Superior   | Outros                                                              | Entre 53 a 60 Simanos                                                          |                                           |                                     | aposentadoria                            |                                          | Sim                             | 2,8                                                    |
| 2018-02-25 | 67                                      | M T                                 | Feminino   | Divorciado(a)            |                   | com parentes alugada                                                | Acima de 60 Simanos                                                            | idade                                     |                                     | outros                                   | divide responsabilidades                 | Sim                             | 2,8                                                    |
| 2018-03-07 | 69                                      | E A R                               | Feminino   | Casado(a)                | Ensino Superior   | Outros                                                              | Acima de 60 Simanos                                                            | idade                                     |                                     | aposentadoria                            |                                          | Sim                             | 2,8                                                    |
| 2018-03-08 | 60                                      | RSAP                                | Feminino   | Casado(a)                |                   | com companheiro(a) e filhos                                         | Entre 53 a 60 Simanos                                                          |                                           |                                     | divide aposentadori                      | responsabilidades                        | Sim                             | 2,8                                                    |
| 2018-03-11 | 60                                      | SH                                  | Feminino   | Casado(a)                | Ensino Superior   | com companheiro(a) e filhos                                         | Entre 53 a 60 Simanos                                                          | idade                                     |                                     | aposentadoria                            |                                          | Sim                             | 2,8                                                    |
| 2018-02-14 | 63                                      | LO                                  | Feminino   | Solteiro(a)              |                   | com parentes outros                                                 | Entre 53 a 60 Simanos                                                          | idade                                     |                                     | divide aposentadori                      | responsabilidades                        | Sim                             | 2,4,6,7,8                                              |

|            |             |                                 |                 |                                     |                     |                            |                             |                        |                                       |     |                                                |
|------------|-------------|---------------------------------|-----------------|-------------------------------------|---------------------|----------------------------|-----------------------------|------------------------|---------------------------------------|-----|------------------------------------------------|
| 2017-05-07 | 72M,j,,c,,s | Feminino Divorciado(a)          |                 | outros                              | com parentes outros | Do lar                     | Acima de 60 Simanos idade   |                        | divide aposentadoriaresponsabilidades | Sim | 2,6,7                                          |
| 2017-10-22 | 69LF        | Feminino Divorciado(a) Superior | Ensino Superior | com filho(s)                        |                     | Professor(a)               | Entre 40 e 52 Simanos       |                        | divide aposentadoriaresponsabilidades | Sim | 2,4,7                                          |
| 2017-12-09 | 65SMP       | Feminino Divorciado(a)          |                 | com filho(s)                        |                     | Outros                     | Entre 53 a 60 Simanos       |                        | aposentadoria                         | Sim | 2,4,7                                          |
| 2018-03-20 | 61CLL       | Feminino Casado(a)              |                 |                                     |                     | Profissional liberal       | Entre 53 a 60 Simanos idade |                        | divide aposentadoriaresponsabilidades | Sim | 2,4,7                                          |
| 2017-05-15 | 67Z N M     | Feminino Casado(a)              |                 |                                     |                     | Professor(a)               | Acima de 60 Simanos         |                        | divide aposentadoriaresponsabilidades | Sim | 2,7,12                                         |
| 2018-03-04 | 70SMG       | Feminino Solteiro(a)            | Ensino Superior | com parentes outros                 |                     | Financeiro/ Administrativo | Entre 53 a 60 Simanos idade |                        | divide outros responsabilidades       | Sim | 2,7,12                                         |
| 2018-02-27 | 61L H       | Feminino Casado(a)              | Ensino Superior |                                     |                     | Do lar                     |                             |                        |                                       | Sim | 2,7                                            |
| 2018-02-14 | 68MLD       | Feminino Solteiro(a)            | Ensino Superior | sozinho                             |                     | Outros                     | Entre 40 e 52 Simanos       |                        | aposentadoria                         | Sim | 3- Diabetes, 7- Dor, 8- Reumatismo 2,3,7,8     |
| 2017-05-19 | 61RRE       | Feminino Casado(a)              |                 |                                     |                     | Do lar                     |                             |                        |                                       | Sim | 2,3,4,7                                        |
| 2017-05-08 | 63Mcvo      | Feminino Casado(a)              | Ensino Superior |                                     |                     | Professor(a)               | Entre 53 a 60 Simanos       |                        | divide aposentadoriaresponsabilidades | Sim | 2,3,4,7                                        |
| 2017-05-22 | 70CRM       | Feminino Divorciado(a)          | Ensino Superior | sozinho                             |                     |                            | Entre 53 a 60 anos Sim      |                        | outros                                | Sim | 2,3,4                                          |
| 2017-10-13 | 70Es        | Feminino Solteiro(a)            | Ensino Superior | sozinho                             |                     | Financeiro/ Administrativo | Entre 53 a 60 Simanos idade |                        | aposentadoria                         | Sim | 2,3,5,7                                        |
| 2017-11-29 | 69LAS       | Feminino                        | Ensino Superior | sozinho                             |                     | Professor(a)               | Entre 53 a 60 Simanos       |                        | aposentadoria                         | Sim | 2,5,6                                          |
| 2017-11-13 | 72M A A     | Feminino                        |                 | outros com filho(s)                 |                     | Do lar                     | Entre 53 a 60 Simanos idade |                        | aposentadoria                         | Sim | 2,3,4,5,7                                      |
| 2018-02-09 | 65Shl       | Feminino Divorciado(a) Superior | Ensino Superior | com filho(s)                        |                     | Professor(a)               | Entre 53 a 60 Simanos       |                        | aposentadoria                         | Sim | 3- Diabetes, 5- Colesterol12- Outros 2,3,5,7   |
| 2018-02-13 | 80Tjfs      | Feminino Casado(a)              |                 |                                     |                     | Professor(a)               | Acima de 60 Simanos idade   |                        | divide aposentadoriaresponsabilidades | Sim | 3- Diabetes, 5- Colesterol 2,3,5,7             |
| 2018-03-13 | 67SMF       | Feminino Divorciado(a)          |                 | alugada sozinha                     |                     | Do lar                     | Entre 53 a 60 Simanos idade |                        | aposentadoria e outros                | Sim | 2,3,4,5,7                                      |
| 2018-02-18 | 61JA        | Masculino Casado(a)             |                 |                                     |                     | Outros                     | Entre 53 a 60 Simanos       |                        | aposentadoria                         | Sim | 3- Diabetes, 5- Colesterol, 12- Outros 2,3,5,7 |
| 2018-03-13 | 60R.        | Feminino Solteiro(a)            |                 | outros                              |                     | Outros                     |                             |                        |                                       | Sim | 3- Diabetes, 5- Colesterol, 12- Outros 2,3,5,7 |
| 2017-10-19 | 76mbxs      | Feminino Casado(a)              |                 |                                     |                     | Do lar                     |                             |                        | outros                                | Sim | 3- Diabetes, 5- Colesterol 2,3,5               |
| 2017-11-18 | 61MFMG      | Feminino                        | Ensino Superior | com filho(s)                        |                     | Professor(a)               | Entre 53 a 60 Simanos       |                        | aposentadoria e outros                | Sim | 2,5                                            |
| 2018-02-14 | 63M.A.N.    | Feminino Solteiro(a)            |                 | sozinho                             |                     | Outros                     | Entre 40 e 52 Simanos       |                        | aposentadoria                         | sim | Sim 3- Diabetes, 5- Colesterol 2,3,5           |
| 2018-02-17 | 70ESM       | Feminino                        | Ensino Superior | com parentes outros                 |                     |                            | Entre 40 e 52 Simanos       |                        | divide aposentadoriaresponsabilidades | Sim |                                                |
| 2018-02-20 | 60H L L C R | Feminino Casado(a)              |                 | cedida com parentes outros          |                     | Do lar                     |                             |                        |                                       | Sim | 3- Diabetes, 5- Colesterol 2,3,5               |
| 2018-03-02 | 65TMM       | Feminino Casado(a)              | Ensino Superior |                                     |                     | Outros                     | Entre 40 e 52 Simanos       | aposentadoria especial | divide aposentadoriaresponsabilidades | Sim | 3- Diabetes, 5- Colesterol 2,3,5               |
| 2018-03-18 | 69LAS       | Feminino                        | Ensino Superior | sozinho                             |                     | Professor(a)               | Entre 53 a 60 Simanos       |                        |                                       | Sim | 3- Diabetes, 5- Colesterol 2,3,5               |
| 2017-10-05 | 67Nmm       | Feminino Casado(a)              |                 |                                     |                     |                            | Entre 40 e 52 Simanos       |                        | divide aposentadoriaresponsabilidades | Sim | 2,5                                            |
| 2018-02-10 | 63Mfla      | Feminino Casado(a)              |                 | com filho(s)                        |                     | Do lar                     | Entre 40 e 52 Simanos       |                        | aposentadoria                         | Sim | 3- Diabetes 1,2,3                              |
| 2017-09-27 | 64J RC      | Feminino Divorciado(a)          |                 | com parentes alugada                |                     | Do lar                     |                             |                        |                                       | Sim | 2,3                                            |
| 2017-11-12 | 76G. M      | Masculino Casado(a)             | Ensino Superior |                                     |                     | Engenheiro(a)              | Entre 40 e 52 Simanos       | aposentadoria especial | aposentadoria                         | Sim | 2,3,5                                          |
| 2018-02-20 | 68MTMS      | Feminino Casado(a)              | Ensino Superior |                                     |                     | Advogado(a)                |                             |                        |                                       | Sim | 2,3                                            |
| 2018-02-20 | 74APC       | Feminino Casado(a)              | Ensino Superior |                                     |                     | Financeiro/ Administrativo | Entre 40 e 52 Simanos       |                        | divide aposentadoriaresponsabilidades | Sim | 2,3                                            |
| 2018-03-07 | 66GPN       | Masculino Divorciado(a)         |                 | alugada sozinha                     |                     | Outros                     |                             |                        |                                       | sim | Sim 2,3                                        |
| 2018-03-11 | 70M         | Feminino Casado(a)              | Ensino Superior |                                     |                     | Professor(a)               | Entre 40 e 52 Simanos       |                        | aposentadoria                         | Sim | 2,3,5                                          |
| 2017-10-03 | 81Y A C K   | Feminino                        | Ensino Superior | sozinho com companheiro(a) e filhos |                     | Professor(a)               | Entre 53 a 60 Simanos       |                        | aposentadoria e outros                | Sim | 2,3                                            |
| 2017-10-09 | 67J C G S   | Masculino Casado(a)             | Ensino Superior |                                     |                     |                            | Entre 40 e 52 Simanos       |                        | aposentadoria                         | Sim | 2,3                                            |
| 2018-03-07 | 60BLSF      | Feminino Casado(a)              | Ensino Superior | com companheiro(a) e alugada        |                     | Outros                     | Entre 40 e 52 Simanos       |                        | divide aposentadoriaresponsabilidades | Sim | 2,4,9                                          |

|            |                  |                        |                 |                                     |                      |                       |       |                                                |     |         |         |
|------------|------------------|------------------------|-----------------|-------------------------------------|----------------------|-----------------------|-------|------------------------------------------------|-----|---------|---------|
| 2017-10-23 | 67GL             | Feminino Solteiro(a)   |                 | sozinho com companheiro(a) e filhos | Outros               | Acima de 60 Simanos   |       | aposentadoria                                  | Sim | 2,4,12  |         |
| 2017-11-12 | 60LR             | Feminino Casado(a)     |                 |                                     | Do lar               |                       |       | outros                                         | Sim | 2,4,12  |         |
| 2017-12-07 | 87Tp             | Feminino               |                 | alugadasozinho                      | Outros               | Entre 40 e 52 Simanos |       | aposentadoria e outros                         | Sim | 2,4,12  |         |
| 2017-05-19 | 65Ls             | Feminino Divorciado(a) | Ensino Superior |                                     | Outros               | Entre 40 e 52 Simanos |       | aposentadoria                                  | sim | Sim     | 2,4     |
| 2017-10-21 | 67GFSN           | Feminino               |                 | com parentes alugadaoutros          | Profissional liberal | Acima de 60 Simanos   | idade |                                                | Sim | 2,4     |         |
| 2017-11-15 | 67J R L          | Masculino Casado(a)    | Ensino Superior | com companheiro(a) e filhos         | Outros               |                       |       | outros                                         | sim | Sim     | 2,4     |
| 2018-02-18 | 76A.A.           | Feminino Divorciado(a) | Ensino Superior | com filho(s)                        | Professor(a)         | Acima de 60 Simanos   | idade | divide aposentadoriaresponsabilidades          | sim | Sim     | 2,4     |
| 2018-03-12 | 64MMCVT          | Feminino Casado(a)     | Ensino Superior | alugada                             | Do lar               | Acima de 60 Simanos   | idade | divide aposentadoriaresponsabilidades          | Sim | 2,4     |         |
| 2018-03-16 | 711 M P M        | Feminino Casado(a)     | Ensino Superior |                                     | Professor(a)         | Entre 40 e 52 Simanos |       | divide aposentadoriaresponsabilidades          | Sim | 2,4     |         |
| 2017-09-27 | 61GGA            | Feminino Solteiro(a)   | Ensino Superior | cedida sozinho                      | Professor(a)         |                       |       |                                                | Sim | 2,4     |         |
| 2017-10-01 | 61CLL            | Feminino Casado(a)     |                 |                                     | Profissional liberal | Entre 53 a 60 Simanos | idade | aposentadoriadiuide e outros responsabilidades | Sim | 2,4     |         |
| 2017-10-01 | 78M A S A        | Feminino               |                 | sozinho com companheiro(a) e filhos | Professor(a)         | Entre 53 a 60 Simanos |       | divide aposentadoriaresponsabilidades          | Sim | 2,4     |         |
| 2017-10-22 | 69R R            | Feminino Casado(a)     | Ensino Superior |                                     | Professor(a)         | Acima de 60 Simanos   |       | divide aposentadoriaresponsabilidades          | Sim | 2,5,9   |         |
| 2017-11-14 | 76M.A.O.N.       | Feminino Casado(a)     | Ensino Superior | alugada                             | Outros               | Entre 40 e 52 Simanos |       | divide aposentadoriaresponsabilidades          | Sim | 2,5,7,8 |         |
| 2018-03-01 | 64M G            | Feminino Casado(a)     | Ensino Superior | alugadasozinho                      | Professor(a)         | Entre 40 e 52 Simanos |       | aposentadoria                                  |     | Sim     | 2,5,7,8 |
| 2017-10-03 | 67E              | Feminino Casado(a)     | Ensino Superior |                                     |                      | Acima de 60 Simanos   | idade | divide aposentadoriaresponsabilidades          | Sim | 2,5,7,8 |         |
| 2017-11-15 | 72C S M          | Feminino Casado(a)     | Ensino Superior | com companheiro(a) e filhos         | Professor(a)         | Entre 53 a 60 Simanos |       | divide aposentadoriaresponsabilidades          | Sim | 2,5,8   |         |
| 2017-11-12 | 65A              | Feminino Casado(a)     | Ensino Superior |                                     |                      | Acima de 60 Simanos   |       | divide aposentadoriaresponsabilidades          | Sim | 2,5,6   |         |
| 2017-11-19 | 73ICFP           | Feminino Casado(a)     | Ensino Superior |                                     | Professor(a)         | Acima de 60 Simanos   |       | aposentadoria                                  | Sim | 2,5,6   |         |
| 2018-02-15 | 61E A F A        | Feminino Casado(a)     | Ensino Superior |                                     | Professor(a)         |                       |       |                                                | Sim | 2,5,6   |         |
| 2017-10-04 | 69I N P          | Feminino Casado(a)     | Ensino Superior |                                     |                      | Entre 53 a 60 Simanos | idade | aposentadoriadiuide e outros responsabilidades | Sim | 2,4,5,8 |         |
| 2017-10-13 | 65MMA            | Feminino Casado(a)     | Ensino Superior |                                     | Outros               | Entre 40 e 52 Simanos |       | aposentadoria                                  | Sim | 2,5,7   |         |
| 2018-03-04 | 69NMR            | Feminino Casado(a)     |                 |                                     | Outros               | Entre 53 a 60 Simanos |       | divide aposentadoriaresponsabilidades          | Sim | 2,5,7   |         |
| 2018-03-11 | 61MRDC           | Feminino Solteiro(a)   | Ensino Superior | com filho(s)                        | Professor(a)         |                       |       | divide responsabilidades                       | Sim | 2,5,7   |         |
| 2017-11-18 | 75De             | Feminino Casado(a)     |                 |                                     | Do lar               |                       |       | divide outros responsabilidades                | Sim | 2,4,5,8 |         |
| 2017-12-02 | 75D L B B        | Feminino Casado(a)     |                 |                                     | Do lar               |                       |       | outros                                         | Sim | 2,4,5,8 |         |
| 2018-02-10 | 67DNM            | Feminino Casado(a)     | Ensino Superior |                                     | Profissional liberal | Entre 40 e 52 Simanos |       | divide aposentadoriaresponsabilidades          | sim | Sim     | 2,4,5,8 |
| 2017-05-15 | D.Ldel C. 711.A. | Feminino Divorciado(a) | Ensino Superior | sozinho                             | Profissional liberal | Acima de 60 Simanos   | idade | aposentadoria                                  | Sim | 2,4,5   |         |
| 2017-10-21 | 74MC             | Feminino               | Ensino Superior | com parentes cedida outros          | Outros               | Acima de 60 Simanos   | idade | aposentadoria                                  | Sim | 2,4,5   |         |
| 2017-10-21 | 60RNG            | Feminino Divorciado(a) | Ensino Superior | alugadasozinho                      |                      | Entre 53 a 60 Simanos |       | aposentadoriadiuide e outros responsabilidades | sim | Sim     | 2,4,5   |
| 2017-10-22 | 62BP             | Feminino               |                 | com parentes alugadaoutros          | Outros               |                       |       | divide outros responsabilidades                | Sim | 2,4,5   |         |
| 2017-11-14 | 74M S M L        | Feminino               | Ensino Superior | com filho(s)                        | Outros               | Entre 40 e 52 Simanos |       |                                                | Sim | 2,4,5   |         |
| 2017-11-16 | 60MRB            | Feminino Divorciado(a) | Ensino Superior | alugadacom filho(s)                 | Outros               | Entre 53 a 60 Simanos |       | aposentadoria                                  | Sim | 2,4,5   |         |
| 2018-03-07 | 73LMZH           | Feminino               | Ensino Superior | sozinho                             | Professor(a)         | Entre 40 e 52 Simanos |       | aposentadoria e outros                         | Sim | 2,4,5   |         |
| 2018-03-08 | 68G.O.G.         | Feminino Solteiro(a)   | Ensino Superior | sozinho                             | Profissional liberal | Acima de 60 Simanos   |       | aposentadoria                                  | Sim | 2,4,5   |         |
| 2017-09-26 | 78LFPF           | Feminino Casado(a)     |                 |                                     | Engenheiro(a)        | Entre 40 e 52 Simanos |       | divide aposentadoriaresponsabilidades          | Sim | 1,4,5   |         |
| 2017-10-01 | 63A A C          | Feminino Casado(a)     |                 |                                     | Outros               | Entre 53 a 60 Simanos |       | aposentadoriadiuide e outros responsabilidades | Sim | 2,5,12  |         |

|            |           |                        |                 |                                       |                            |                            |                          |                          |        |            |
|------------|-----------|------------------------|-----------------|---------------------------------------|----------------------------|----------------------------|--------------------------|--------------------------|--------|------------|
| 2017-10-15 | 60Jslm    | Feminino Casado(a)     | Ensino Superior |                                       |                            | Entre 53 a 60 Simanos      | divide responsabilidades | Sim                      | 2,5,12 |            |
| 2017-11-12 | 61MLC     | Feminino Casado(a)     |                 | com companheiro(a) e filhos           | Professor(a)               | Entre 40 e 52 Simanos      | aposentadoria especial   | divide responsabilidades | Sim    | 2,5,12     |
| 2017-11-13 | 60LCGK    | Feminino Divorciado(a) | Ensino Superior | com filho(s)                          | Outros                     | Entre 40 e 52 Simanos      | aposentadoria            |                          | Sim    | 2,5,12     |
| 2018-02-13 | 61MLM     | Feminino Solteiro(a)   | Ensino Superior | com filho(s)                          | Outros                     | Entre 53 a 60 Simanos      | aposentadoria            |                          | Sim    | 2,5,12     |
| 2018-02-15 | 73Los     | Feminino Casado(a)     | Ensino Superior |                                       | Professor(a)               | Entre 53 a 60 Simanos      | divide responsabilidades |                          | Sim    | 2,5,12     |
| 2018-02-15 | 66RQA     | Feminino Divorciado(a) | Ensino Superior | sozinho                               | Professor(a)               | Entre 40 e 52 anos         |                          |                          | Sim    | 2,5,12     |
| 2018-03-13 | 80GVF     | Masculino Casado(a)    | Ensino Superior |                                       | Financeiro/ Administrativo | Entre 40 e 52 Simanos      | divide responsabilidades |                          | Sim    | 2,5,12     |
| 2018-03-22 | 64EK      | Feminino Divorciado(a) |                 | sozinho com companheiro(a) e filhos   | Do lar                     |                            | outros                   |                          | Sim    | 2,5,12     |
| 2017-05-19 | 64FMMB    | Feminino Casado(a)     | Ensino Superior | com filho(s)                          | Outros                     | Entre 53 a 60 Simanos      | aposentadoria            |                          | Sim    | 2,5        |
| 2017-09-27 | 65A       | Feminino Casado(a)     | Ensino Superior |                                       |                            | Acima de 60 anos           | divide responsabilidades |                          | Sim    | 2,5        |
| 2017-10-12 | 60E M     | Feminino Casado(a)     |                 | com companheiro(a) e filhos           | Outros                     |                            | divide responsabilidades |                          | Sim    | 12- Outros |
| 2017-10-21 | 66DVGF    | Feminino               |                 | alugada                               | sozinho                    | Professor(a)               | Entre 53 a 60 Simanos    |                          | Sim    | 2,5        |
| 2017-11-11 | 70MHSK    | Feminino               | Ensino Superior | sozinho                               | Outros                     | Entre 40 e 52 Simanos      | aposentadoria            |                          | Sim    | 2,5        |
| 2017-11-12 | 66SMTSS   | Feminino               | Ensino Superior | sozinho                               | Professor(a)               | Entre 53 a 60 Simanos      | aposentadoria e outros   |                          | Sim    | 2,5        |
| 2017-11-12 | 60MCMDS   | Feminino Casado(a)     | Ensino Superior |                                       | Professor(a)               | Entre 53 a 60 Simanos      | divide responsabilidades |                          | Sim    | 2,5        |
| 2017-11-15 | 66CSS     | Feminino Casado(a)     |                 |                                       | Do lar                     |                            | outros                   |                          | Sim    | 2,5        |
| 2017-11-19 | 76MA      | Feminino               | Ensino Superior | sozinho                               | Profissional liberal       | Acima de 60 Simanos        | aposentadoria e outros   |                          | Sim    | 2,5        |
| 2017-11-28 | 65SMPS    | Feminino Casado(a)     |                 |                                       | Profissional liberal       | Entre 53 a 60 Simanos      | idade                    | aposentadoria e outros   | Sim    | 2,5        |
| 2017-12-01 | 62M F A A | Feminino               |                 | com parentes alugada                  | outros                     | Professor(a)               | Entre 53 a 60 Simanos    | aposentadoria e outros   | Sim    | 2,5        |
| 2018-02-09 | 64mbk     | Feminino Solteiro(a)   |                 | com netos com companheiro(a) e filhos | Outros                     | Entre 40 e 52 Simanos      | divide responsabilidades |                          | Sim    | 2,5        |
| 2018-02-11 | 64Me      | Feminino Casado(a)     | Ensino Superior | com filho(s)                          | Outros                     | Entre 53 a 60 Simanos      | divide responsabilidades |                          | Sim    | 2,5        |
| 2018-02-11 | 68JPN     | Feminino Solteiro(a)   | Ensino Superior | alugada                               | sozinho                    | Financeiro/ Administrativo | Entre 40 e 52 Simanos    | aposentadoria            | Sim    | 2,5        |
| 2018-02-13 | 64FMMB    | Feminino Casado(a)     | Ensino Superior | com companheiro(a) e filhos           | Outros                     | Acima de 60 Simanos        | aposentadoria            |                          | Sim    | 2,5        |
| 2018-02-20 | 76Mlbx    | Feminino Casado(a)     |                 |                                       | Do lar                     |                            |                          |                          | Sim    | 2,5        |
| 2018-02-21 | 65MMF     | Feminino Divorciado(a) | Ensino Superior | com filho(s)                          | Professor(a)               | Entre 40 e 52 Simanos      | aposentadoria            |                          | Sim    | 2,5        |
| 2018-03-04 | 61gc      | Feminino Casado(a)     | Ensino Superior |                                       | Professor(a)               | Entre 53 a 60 Simanos      | aposentadoria            |                          | Sim    | 2,5        |
| 2018-03-23 | 69F.C.    | Feminino Solteiro(a)   | Ensino Superior | sozinho                               | Advogado(a)                | Acima de 60 Simanos        | idade                    | aposentadoria            | Sim    | 2,5        |
| 2017-10-01 | 60IM      | Feminino Divorciado(a) | Ensino Superior | com filho(s)                          | Engenheiro(a)              | Entre 53 a 60 Simanos      | divide responsabilidades |                          | Sim    | 2,5        |
| 2017-10-02 | 61NMMF    | Feminino Casado(a)     | Ensino Superior |                                       | Professor(a)               | Entre 53 a 60 Simanos      | divide responsabilidades |                          | Sim    | 2,5        |
| 2017-10-05 | 67SS      | Feminino Divorciado(a) | Ensino Superior | com filho(s)                          |                            | Acima de 60 Simanos        | idade                    | aposentadoria            | Sim    | 2,5        |
| 2017-10-13 | 63GFM     | Feminino Solteiro(a)   | Ensino Superior | sozinho                               | Outros                     | Acima de 60 Simanos        | aposentadoria            |                          | Sim    | 2,12       |
| 2017-10-21 | 70MG      | Feminino Divorciado(a) | Ensino Superior | sozinho                               | Professor(a)               | Entre 53 a 60 Simanos      | aposentadoria            |                          | Sim    | 2,12       |
| 2017-11-14 | 71MECS    | Feminino Solteiro(a)   |                 | sozinho                               |                            | Acima de 60 Simanos        | aposentadoria            |                          | Sim    | 2,12       |
| 2017-11-20 | 66lct     | Feminino Divorciado(a) | Ensino Superior |                                       | Outros                     | Entre 53 a 60 Simanos      | aposentadoria            |                          | Sim    | 2,12       |
| 2018-02-13 | 77EFM     | Feminino               |                 | sozinho                               | Do lar                     | Acima de 60 Simanos        | idade                    |                          | Sim    | 2,12       |
| 2018-02-13 | 61Acv     | Feminino Divorciado(a) |                 | com parentes alugada                  | outros                     | Entre 40 e 52 Simanos      |                          |                          | Sim    | 2,12       |
| 2018-03-03 | 73N R D   | Feminino Casado(a)     |                 |                                       | Outros                     |                            | outros                   |                          | Sim    | 2,12       |
| 2018-03-10 | 73NRD     | Feminino Casado(a)     |                 |                                       | Profissional liberal       |                            |                          |                          | Sim    | 2,12       |
| 2018-03-12 | 66M.I.B   | Feminino               |                 | com parentes outros                   | Do lar                     | Entre 53 a 60 Simanos      | idade                    | divide responsabilidades | Sim    | 2,12       |
| 2018-03-18 | 69JMGC    | Feminino Divorciado(a) |                 | com parentes outros                   |                            | Acima de 60 Simanos        |                          |                          | Sim    | 2,12       |
| 2018-03-21 | 75A A     | Feminino Casado(a)     | Ensino Superior |                                       | Outros                     | Entre 40 e 52 Simanos      | aposentadoria e outros   | divide responsabilidades | Sim    | 2,12       |

|            |           |                        |                 |                                         |           |                             |                            |                          |
|------------|-----------|------------------------|-----------------|-----------------------------------------|-----------|-----------------------------|----------------------------|--------------------------|
| 2017-09-25 | 64Tof     | Feminino Solteiro(a)   | Ensino Superior | com filho(s)                            |           | Entre 40 e 52 Simanos       | aposentadoria              | Sim                      |
| 2017-05-11 | 63obmf    | Masculino Casado(a)    |                 | com companheiros(a), filho(s) e neto(s) | Outros    |                             | divide responsabilidades   | Sim                      |
| 2017-05-14 | 66EAN     | Masculino Solteiro(a)  |                 | cedida                                  | sozinho   | Acima de 60 Simanos idade   | aposentadoria              | Sim                      |
| 2017-05-20 | 64A C     | Feminino Divorciado(a) | Ensino Superior | alugada                                 | sozinho   |                             |                            | Sim                      |
| 2017-05-21 | 62ARPO    | Feminino Casado(a)     |                 |                                         |           | Entre 40 e 52 Simanos       | Professor(a)               | aposentadoria            |
| 2017-09-30 | 62H L     | Feminino Casado(a)     | Ensino Superior | com parentes                            | outros    | Entre 53 a 60 Simanos       | divide responsabilidades   | Sim                      |
| 2017-10-01 | 60E. D.N. | Feminino               | Ensino Superior | com filho(s)                            |           |                             |                            | Sim                      |
| 2017-10-05 | 66E P R   | Feminino               |                 | com filho(s)                            | Outros    | Entre 53 a 60 Simanos       | aposentadoria              | Sim                      |
| 2017-10-09 | 60C.M.F   | Feminino Divorciado(a) | Ensino Superior | com parentes                            | outros    | Professor(a)                |                            | Sim                      |
| 2017-10-13 | 69CSG     | Feminino Divorciado(a) | Ensino Superior | sozinho                                 |           | Acima de 60 Simanos         | Professor(a)               | aposentadoria            |
| 2017-10-14 | 64ESM     | Feminino               |                 | sozinho                                 |           | Do lar                      |                            | Sim                      |
| 2017-10-14 | 67RMND    | Feminino Divorciado(a) | Ensino Superior | sozinho                                 |           | Entre 40 e 52 Simanos       | Outros                     | aposentadoria            |
| 2017-10-16 | 74CMPA    | Feminino               | Ensino Superior | sozinho                                 |           | Entre 40 e 52 Simanos       | Professor(a)               | aposentadoria e outros   |
| 2017-10-17 | 62MHBCK   | Feminino Casado(a)     | Ensino Superior |                                         |           | Entre 53 a 60 Simanos       | Professor(a)               | aposentadoria            |
| 2017-10-20 | 68JNS     | Masculino Casado(a)    | Ensino Superior |                                         |           | Entre 40 e 52 Simanos       | Financeiro/ Administrativo | aposentadoria            |
| 2017-10-21 | 60I P L   | Feminino Solteiro(a)   | Ensino Superior | com filho(s)                            |           |                             |                            | outros                   |
| 2017-10-23 | 71Ceps    | Feminino Solteiro(a)   | Ensino Superior | com parentes                            | outros    | Entre 40 e 52 Simanos       | Professor(a)               | divide responsabilidades |
| 2017-11-14 | 76GGL     | Feminino Solteiro(a)   | Ensino Superior | outros                                  | com netos | Outros                      | Acima de 60 anos           | divide responsabilidades |
| 2017-11-15 | 64VLLG    | Feminino Divorciado(a) | Ensino Superior | com filho(s)                            | Outros    |                             |                            | sim                      |
| 2017-11-20 | 61NTA     | Feminino Divorciado(a) |                 | alugada                                 | sozinho   | Entre 53 a 60 Simanos       | Outros                     | aposentadoria            |
| 2017-12-01 | 69MADSK   | Feminino Casado(a)     | Ensino Superior | com companheiro(a) e filhos             |           | Entre 40 e 52 Simanos       | Professor(a)               | aposentadoria            |
| 2018-02-08 | 69Ro      | Feminino Divorciado(a) |                 | alugada                                 | sozinho   | Do lar                      |                            | Sim                      |
| 2018-02-13 | 69WHBM    | Feminino               |                 | cedida                                  | sozinho   | Entre 53 a 60 Simanos idade | Outros                     | aposentadoria            |
| 2018-02-13 | 60L m a   | Feminino Casado(a)     | Ensino Superior | alugada                                 |           | Entre 53 a 60 Simanos       | Outros                     | divide responsabilidades |
| 2018-02-13 | 74A S H   | Feminino               |                 | sozinho                                 |           | Acima de 60 Simanos         | Do lar                     | aposentadoria            |
| 2018-02-15 | 67A M O M | Feminino Casado(a)     |                 |                                         |           | Entre 53 a 60 Simanos       | Professor(a)               | aposentadoria            |
| 2018-02-16 | 63TAB     | Feminino Solteiro(a)   | Ensino Superior | com parentes                            | outros    | Entre 40 e 52 Simanos       | Professor(a)               | divide responsabilidades |
| 2018-02-26 | 71MCSN    | Feminino Solteiro(a)   | Ensino Superior | com parentes                            | outros    | Entre 40 e 52 Simanos       | Outros                     | divide responsabilidades |
| 2018-02-26 | 68APF     | Feminino Divorciado(a) | Ensino Superior | com parentes                            | outros    | Entre 53 a 60 Simanos       | Outros                     | aposentadoria            |
| 2018-03-01 | 61Gjgsm   | Feminino Casado(a)     | Ensino Superior | sozinho                                 |           | Do lar                      |                            | Sim                      |
| 2018-03-04 | 60mi      | Feminino Casado(a)     |                 |                                         |           | Entre 53 a 60 Simanos idade | Do lar                     | aposentadoria e outros   |
| 2018-03-11 | 60A       | Feminino               | Ensino Superior | com filho(s)                            |           | Professor(a)                |                            | sim                      |
| 2018-03-11 | 64M C N M | Feminino Casado(a)     | Ensino Superior | com companheiro(a) e filhos             | com       | Entre 53 a 60 Simanos       | Professor(a)               | aposentadoria            |
| 2018-03-12 | 66Eac     | Feminino Casado(a)     | Ensino Superior | com companheiro(a) e filhos             |           | Acima de 60 Simanos idade   | Do lar                     | divide responsabilidades |
| 2018-03-13 | 62Gjgsm   | Feminino Casado(a)     | Ensino Superior | sozinho                                 |           | Do lar                      |                            | Sim                      |
| 2018-03-13 | 79Wa      | Feminino               | Ensino Superior |                                         |           | Acima de 60 Simanos         | Outros                     | divide responsabilidades |
| 2018-03-13 | 70MM      | Feminino Casado(a)     |                 |                                         |           | Entre 53 a 60 Simanos       | Outros                     | divide responsabilidades |
| 2018-03-14 | 65R       | Feminino Casado(a)     | Ensino Superior |                                         |           | Entre 53 a 60 Simanos       | Professor(a)               | divide responsabilidades |
| 2018-03-16 | 65MTS     | Feminino Divorciado(a) |                 | sozinho                                 |           | Acima de 60 Simanos idade   | Outros                     | aposentadoria            |
| 2018-03-16 | 69NM      | Feminino               |                 | com filho(s)                            |           | Entre 53 a 60 Simanos       | Professor(a)               | divide responsabilidades |
| 2018-03-17 | 64RJM     | Masculino Casado(a)    | Ensino Superior |                                         |           | Entre 53 a 60 Simanos       | Professor(a)               | divide responsabilidades |

|            |               |           |               |                 |                                                                             |                            |         |               |                                 |     |                                |
|------------|---------------|-----------|---------------|-----------------|-----------------------------------------------------------------------------|----------------------------|---------|---------------|---------------------------------|-----|--------------------------------|
| 2018-03-17 | 65JWT         | Masculino | Divorciado(a) | Ensino Superior | sozinho                                                                     | Outros                     | Simanos | Entre 53 a 60 | apostadoria                     | Sim |                                |
| 2018-03-18 | 77V.A.        | Feminino  |               | Ensino Superior | sozinho                                                                     | Outros                     | Simanos | Entre 40 e 52 |                                 | Sim |                                |
| 2018-03-19 | 71JMOV        | Feminino  | Solteiro(a)   | Ensino Superior | sozinho                                                                     | Advogado(a)                | Simanos | Acima de 60   | apostadoria                     | Sim |                                |
| 2018-03-23 | 63Mrg         | Feminino  | Casado(a)     | Ensino Superior |                                                                             | Outros                     |         |               | divide responsabilidades        | Sim |                                |
| 2018-03-25 | 69JOA         | Masculino | Casado(a)     | Ensino Superior |                                                                             | Professor(a)               | Simanos | Entre 53 a 60 | apostadoriadesresponsabilidades | Sim |                                |
| 2018-03-25 | 62IEN         | Feminino  | Solteiro(a)   | Ensino Superior | sozinho                                                                     |                            | Simanos | Acima de 60   |                                 | Sim |                                |
| 2017-09-25 | 68M.A.M.J     | Feminino  |               |                 | com filho(s)                                                                | Professor(a)               | Simanos | Entre 40 e 52 | apostadoriadesresponsabilidades | Sim |                                |
| 2017-09-28 | 73IBAP        | Feminino  | Casado(a)     |                 |                                                                             | Outros                     | Simanos | Entre 53 a 60 | apostadoriadesresponsabilidades | Sim |                                |
| 2017-10-01 | 69MEMD        | Feminino  | Divorciado(a) | Ensino Superior | sozinho                                                                     | Professor(a)               | Simanos | Entre 40 e 52 | apostadoria                     | Sim |                                |
| 2017-10-01 | 64LBCSC       | Feminino  | Casado(a)     | Ensino Superior |                                                                             |                            | Simanos | Entre 40 e 52 | apostadoriadesresponsabilidades | Sim |                                |
| 2017-05-07 | 64L.B.C.S.C   | Feminino  | Casado(a)     | Ensino Superior |                                                                             | Outros                     | Simanos | Entre 40 e 52 | apostadoria                     | Sim |                                |
| 2017-10-08 | 65ISR         | Feminino  | Divorciado(a) | Ensino Superior | sozinho                                                                     | Financeiro/ Administrativo | Simanos | Entre 53 a 60 | apostadoriadesresponsabilidades | Sim | 2,4,6,7                        |
| 2017-12-09 | 65ISR         | Feminino  | Divorciado(a) | Ensino Superior | sozinho com companheiros(a), filho(s) e neto(s)                             | Financeiro/ Administrativo | Simanos | Entre 53 a 60 | apostadoriadesresponsabilidades | Sim | 2,4,6,7                        |
| 2018-02-09 | 60lvani       | Feminino  | Casado(a)     |                 |                                                                             | Do lar                     |         |               | apostadoria                     | Sim | 7- Dor                         |
| 2018-02-13 | 65V R S       | Feminino  | Solteiro(a)   |                 | sozinho                                                                     | Outros                     | Simanos | Acima de 60   | apostadoria                     | Sim | 2,4,6,7                        |
| 2017-10-22 | 72L.B.M       | Feminino  | Solteiro(a)   | Ensino Superior | sozinho com companheiro(a) e filhos                                         | Professor(a)               | Simanos | Acima de 60   | apostadoria                     | Sim | 2,4,6,7                        |
| 2017-10-05 | 64F.M.D.      | Feminino  | Casado(a)     |                 |                                                                             | Do lar                     | Simanos | Entre 53 a 60 | apostadoriadesresponsabilidades | Sim | 4,7                            |
| 2017-10-17 | 61MLXA        | Feminino  | Casado(a)     | Ensino Superior |                                                                             | Professor(a)               | Simanos | Entre 53 a 60 | apostadoriadesresponsabilidades | Sim | 2,4,7                          |
| 2018-02-21 | 63M           | Feminino  | Casado(a)     |                 |                                                                             | Do lar                     | Simanos | Entre 53 a 60 | apostadoriadesresponsabilidades | Sim | 2,4,7                          |
| 2018-03-12 | 69VESV        | Feminino  | Casado(a)     |                 |                                                                             |                            | Simanos | Entre 53 a 60 | apostadoriadesresponsabilidades | Sim | 2,4,7                          |
| 2018-03-03 | 65NMG         | Feminino  | Casado(a)     | Ensino Superior |                                                                             | Professor(a)               | Simanos | Entre 40 e 52 | apostadoriadesresponsabilidades | Sim | 7- Dor, 12- Outros 7,12        |
| 2017-04-30 | 72MS          | Feminino  | Solteiro(a)   |                 | com parentes outros com companheiro(a) e filhos com companheiro(a) e filhos | Outros                     | Simanos | Entre 53 a 60 | apostadoria                     | Sim | 3- Diabetes, 7- Dor            |
| 2017-05-08 | 68E S A S     | Feminino  | Casado(a)     |                 |                                                                             | Do lar                     | Simanos | Acima de 60   | divide responsabilidades        | Sim |                                |
| 2017-10-23 | 62T .O        | Feminino  | Casado(a)     | Ensino Superior |                                                                             |                            |         |               | outros                          | Sim | 7- Dor                         |
| 2018-02-18 | 67Jcb         | Feminino  |               | Ensino Superior | alugada com filho(s)                                                        | Outros                     |         |               |                                 | Sim | 7- Dor                         |
| 2018-03-02 | 61MC          | Feminino  | Casado(a)     | Ensino Superior |                                                                             | Professor(a)               | Simanos | Entre 53 a 60 | apostadoriadesresponsabilidades | Sim | 7- Dor                         |
| 2018-03-20 | 73n p m       | Feminino  | Casado(a)     | Ensino Superior |                                                                             | Professor(a)               | Simanos | Entre 40 e 52 | apostadoriadesresponsabilidades | Sim | 7- Dor                         |
| 2018-03-11 | 63MMCCV       | Feminino  | Casado(a)     | Ensino Superior |                                                                             | Professor(a)               | Simanos | Entre 53 a 60 | apostadoriadesresponsabilidades | Sim | 2,3,4,6,7                      |
| 2018-02-22 | 65L A N D     | Feminino  | Casado(a)     | Ensino Superior |                                                                             | Professor(a)               | Simanos | Entre 53 a 60 | apostadoriadesresponsabilidades | Sim | 3,6,12                         |
| 2017-10-17 | 74A C P       | Feminino  | Divorciado(a) | Ensino Superior | sozinho                                                                     | Advogado(a)                | Simanos | Acima de 60   | outros                          | Sim | 2,3,4,7                        |
| 2017-10-23 | 70AVV         | Feminino  |               | Ensino Superior | sozinho com companheiro(a) e filhos                                         | Outros                     | Simanos | Entre 53 a 60 |                                 | Sim | 2,4,5,7                        |
| 2017-05-07 | 64JM          | Masculino | Casado(a)     | Ensino Superior |                                                                             | Outros                     | Simanos | Acima de 60   | apostadoria                     | Sim | 3- Diabetes, 7- Dor 3,7        |
| 2017-05-03 | 70RMES        | Masculino | Casado(a)     |                 |                                                                             | Professor(a)               | Simanos | Entre 53 a 60 | apostadoria                     | Sim | 3- Diabetes, 5- Colesterol 3,5 |
| 2018-02-14 | 60MTM         | Feminino  | Solteiro(a)   | Ensino Superior | com parentes outros                                                         | Professor(a)               | Simanos | Entre 53 a 60 | apostadoriadesresponsabilidades | Sim | 3- Diabetes, 5- Colesterol 3,5 |
| 2017-09-27 | 80S.T.S.B.    | Feminino  |               |                 | sozinho                                                                     | Professor(a)               | Simanos | Entre 40 e 52 |                                 | Sim | 1,3,6,7                        |
| 2017-10-14 | 61DL          | Feminino  | Divorciado(a) |                 | alugada com filho(s)                                                        | Outros                     | Simanos | Entre 53 a 60 | apostadoria                     | Sim | 3- Diabetes, 12- Outros 3,12   |
| 2017-11-16 | 64TCRP        | Feminino  |               | Ensino Superior | sozinho com companheiro(a) e filhos                                         | Outros                     |         |               |                                 | Sim | 3- Diabetes, 12- Outros 3,12   |
| 2017-04-30 | 63e p f       | Feminino  | Casado(a)     |                 |                                                                             | Do lar                     |         |               | divide responsabilidades        | Sim |                                |
| 2017-05-18 | 65NRS         | Feminino  |               | Ensino Superior | sozinho                                                                     | Professor(a)               | Simanos | Entre 53 a 60 |                                 | Sim | 3- Diabetes                    |
| 2017-11-14 | 63M. E. C. V. | Feminino  | Casado(a)     | Ensino Superior | alugada sozinha                                                             | Professor(a)               | Simanos | Acima de 60   | apostadoria                     | Sim | 3- Diabetes                    |
| 2018-02-11 | 62S           | Feminino  |               | Ensino Superior | com parentes outros                                                         | Advogado(a)                |         |               | apostadoriadesresponsabilidades | sim | 3- Diabetes                    |

|            |            |           |                 |               |                             |                                         |                       |        |        |                            |                          |                          |                                  |                                |
|------------|------------|-----------|-----------------|---------------|-----------------------------|-----------------------------------------|-----------------------|--------|--------|----------------------------|--------------------------|--------------------------|----------------------------------|--------------------------------|
| 2018-03-03 | 64S        | Feminino  | Ensino Superior | Divorciado(a) | com parentes outros         | Simanos                                 | Entre 53 a 60 idade   |        | sim    | Sim                        | 3- Diabetes              |                          |                                  |                                |
| 2018-03-12 | 61JSC      | Masculino | Casado(a)       |               | com companheiro(a) e filhos | Outros                                  | Entre 53 a 60 Simanos |        | divide | responsabilidades          | sim                      | Sim                      | 3- Diabetes                      |                                |
| 2017-10-01 | 61VLML     | Feminino  | Casado(a)       | Superior      | alugada                     |                                         | Entre 53 a 60 Simanos |        |        | apostentadoria             |                          | Sim                      | 3- Diabetes                      |                                |
| 2017-05-17 | 73DS       | Feminino  | Casado(a)       | Superior      | com parentes outros         | Professor(a)                            | Entre 53 a 60 Simanos |        |        | outros                     |                          | Sim                      | 2,4,12                           |                                |
| 2017-09-30 | 60v        | Feminino  | Casado(a)       |               | alugada                     | Do lar                                  |                       |        |        | outros                     |                          | Sim                      | 2,4,12                           |                                |
| 2018-03-02 | 61Irani    | Feminino  |                 |               | com filho(s)                |                                         | Entre 53 a 60 Simanos |        |        | divide responsabilidades   |                          | Sim                      | 2,4,12                           |                                |
| 2017-09-29 | 69CD       | Feminino  | Casado(a)       | Superior      |                             | Profissional liberal                    | Entre 53 a 60 Simanos |        |        | divide aposentadoria       | responsabilidades        | Sim                      | 2,4                              |                                |
| 2017-10-12 | 62MIA      | Feminino  |                 | Superior      |                             | Professor(a)                            | Entre 53 a 60 Simanos |        |        | divide aposentadoria       | responsabilidades        | Sim                      | 2,4                              |                                |
| 2017-11-13 | 60SAA      | Feminino  |                 |               | sozinho                     | Professor(a)                            | Entre 40 e 52 Simanos |        |        | apostentadoria             |                          | Sim                      | 2,4                              |                                |
| 2017-11-20 | 60LRSF     | Feminino  |                 |               | com filho(s)                | Outros                                  |                       |        |        | apostentadoria             |                          | Sim                      | 2,4                              |                                |
| 2017-12-01 | 60Eacf     | Feminino  | Divorciado(a)   | Superior      |                             | sozinho                                 |                       |        |        |                            |                          | Sim                      | 2,4                              |                                |
| 2018-02-12 | 61NFV      | Feminino  | Divorciado(a)   |               | cedida sozinho              | Outros                                  | Entre 53 a 60 Simanos |        |        | apostentadoria             |                          | Sim                      | 2,4                              |                                |
| 2018-02-13 | 62MHL      | Feminino  | Casado(a)       |               | sozinho                     | Outros                                  | Entre 53 a 60 Simanos | idade  |        | apostentadoria             |                          | Sim                      | 2,4                              |                                |
| 2018-02-14 | 70T M      | Feminino  | Solteiro(a)     | Superior      |                             | sozinho                                 | Entre 40 e 52 Simanos |        |        | Professor(a)               | apostentadoria           | Sim                      | 2,4                              |                                |
| 2018-02-15 | 61MM       | Feminino  | Solteiro(a)     | Superior      |                             | sozinho                                 | Entre 53 a 60 Simanos |        |        | apostentadoria e outros    |                          | Sim                      | 2,4                              |                                |
| 2018-02-28 | 68m l g    | Feminino  |                 | Superior      |                             | sozinho                                 | Acima de 60 Simanos   |        |        | Professor(a)               | apostentadoria           | Sim                      | 2,4                              |                                |
| 2018-03-05 | 61MDR      | Feminino  | Divorciado(a)   |               | alugada com filho(s)        | Do lar                                  |                       |        |        |                            |                          | Sim                      | 2,4                              |                                |
| 2017-09-29 | 69Mrb      | Feminino  |                 | Superior      |                             | sozinho                                 | Entre 40 e 52 Simanos |        |        | Do lar                     | apostentadoria           | Sim                      | 2,4                              |                                |
| 2018-03-15 | 67l. M. O  | Feminino  |                 |               |                             | sozinho                                 |                       |        |        | Do lar                     |                          | Sim                      | 1,5,10                           |                                |
| 2018-03-13 | 61FFDM     | Feminino  | Divorciado(a)   | Superior      |                             | sozinho                                 |                       |        |        | Professor(a)               |                          | Sim                      | 5,7,8,12                         |                                |
| 2018-03-06 | 73CVR      | Feminino  | Divorciado(a)   |               | sozinho                     | Outros                                  | Acima de 60 Simanos   | idade  |        | apostentadoria             |                          | Sim                      | 5- Colesterol, 8- Reumatismo 5,8 |                                |
| 2017-10-09 | 65Edna     | Feminino  |                 |               | sozinho                     |                                         |                       |        |        | Financeiro/ Administrativo |                          | Sim                      | 2,4,5,6                          |                                |
| 2018-03-04 | 61N M      | Feminino  | Divorciado(a)   | Superior      | cedida sozinho              | Outros                                  |                       |        |        |                            |                          | Sim                      | 2,4,5,6                          |                                |
| 2017-09-28 | 67D M M    | Feminino  | Casado(a)       | Superior      |                             |                                         | Entre 40 e 52 Simanos |        |        | apostentadoria e outros    |                          | Sim                      | 5,6                              |                                |
| 2017-09-26 | 63CCM      | Feminino  | Casado(a)       | Superior      |                             |                                         | Entre 53 a 60 Simanos | outros |        | Outros                     | outros                   | Sim                      | 2,4,5,7,12                       |                                |
| 2018-03-22 | 65mlv      | Feminino  | Divorciado(a)   | Superior      |                             | com filho(s)                            |                       |        |        | Do lar                     |                          | Sim                      | 2,4,5,12                         |                                |
| 2017-10-12 | 62GPS      | Feminino  | Casado(a)       | Superior      |                             | com companheiros(a), filho(s) e neto(s) |                       |        |        | Outros                     | divide responsabilidades | Sim                      | 2,4,5                            |                                |
| 2017-10-12 | 60A M D    | Feminino  | Divorciado(a)   | Superior      |                             | com filho(s)                            | Entre 53 a 60 Simanos |        |        | Professor(a)               | apostentadoria           | Sim                      | 2,4,5                            |                                |
| 2017-10-14 | 70l O C    | Feminino  | Casado(a)       |               |                             |                                         | Entre 53 a 60 Simanos |        |        | Professor(a)               | apostentadoria           | Sim                      | 2,4,5                            |                                |
| 2017-10-18 | 62A m d    | Feminino  | Divorciado(a)   | Superior      |                             | com filho(s)                            | Entre 53 a 60 Simanos |        |        | Professor(a)               | apostentadoria           | Sim                      | 2,4,5                            |                                |
| 2018-02-23 | 69DGC      | Masculino |                 |               | sozinho                     | Outros                                  | Acima de 60 Simanos   |        |        |                            | apostentadoria           | sim                      | Sim                              | 2,4,5                          |
| 2017-10-01 | 60S.A.S.   | Feminino  |                 |               | sozinho                     |                                         | Entre 40 e 52 Simanos |        |        | Professor(a)               | apostentadoria e outros  | Sim                      | 2,4,5                            |                                |
| 2017-10-09 | 63MM       | Feminino  | Casado(a)       | Superior      |                             |                                         | Entre 40 e 52 Simanos |        |        | Outros                     | divide aposentadoria     | responsabilidades        | Sim                              | 5- Colesterol, 12- Outros 5,12 |
| 2017-10-14 | 60E T S    | Feminino  | Casado(a)       |               |                             |                                         | Entre 40 e 52 Simanos |        |        | Professor(a)               | apostentadoria           | Sim                      | 5- Colesterol, 12- Outros 5,12   |                                |
| 2017-10-14 | 74ARF      | Feminino  | Solteiro(a)     |               | com parentes outros         |                                         | Entre 53 a 60 Simanos |        |        | Professor(a)               | apostentadoria           | Sim                      | 5- Colesterol, 12- Outros 5,12   |                                |
| 2017-11-22 | 64ME       | Feminino  | Casado(a)       | Superior      |                             |                                         | Acima de 60 Simanos   | idade  |        | Do lar                     | apostentadoria           | Sim                      | 5- Colesterol, 12- Outros 5,12   |                                |
| 2018-03-07 | 63M.I.F    | Feminino  | Divorciado(a)   |               | com parentes alugada        | outros                                  |                       |        |        | Do lar                     | divide responsabilidades | Sim                      | 5- Colesterol, 12- Outros 5,12   |                                |
| 2018-03-07 | 63L. A. H. | Feminino  | Casado(a)       |               |                             |                                         | Entre 40 e 52 Simanos |        |        | Professor(a)               | divide aposentadoria     | responsabilidades        | Sim                              | 5- Colesterol, 12- Outros 5,12 |
| 2017-04-29 | 73IBAP     | Feminino  | Casado(a)       |               |                             |                                         | Entre 53 a 60 Simanos |        |        | Outros                     | apostentadoria e outros  | divide responsabilidades | Sim                              |                                |
| 2017-05-21 | 67Mjpb     | Feminino  | Divorciado(a)   |               | com companheiro(a) e filhos |                                         | Entre 53 a 60 Simanos | idade  |        |                            | apostentadoria e outros  | Sim                      | 5- Colesterol                    |                                |

|            |                  |                        |                 |                             |                      |                       |                        |                                                |                                       |     |                      |
|------------|------------------|------------------------|-----------------|-----------------------------|----------------------|-----------------------|------------------------|------------------------------------------------|---------------------------------------|-----|----------------------|
| 2017-10-16 | M C C B M<br>60G | Feminino Casado(a)     | Ensino Superior |                             | Engenheiro(a)        | Entre 40 e 52 Simanos | aposentadoria especial |                                                | divide responsabilidades              | Sim | 5- Colesterol        |
| 2017-10-24 | 78ISV            | Feminino               | Ensino Superior | alugadasozinho              |                      | Entre 40 e 52 Simanos |                        | aposentadoria e outros                         |                                       | Sim | 5- Colesterol        |
| 2017-11-15 | 60GSL            | Masculino              | Ensino Superior | alugadacom filho(s)         | Professor(a)         | Entre 53 a 60 Simanos |                        |                                                |                                       | Sim | 5- Colesterol        |
| 2018-03-21 | 61Hdcl           | Feminino Casado(a)     |                 | com companheiro(a) e filhos |                      | Entre 53 a 60 Simanos |                        |                                                | divide aposentadoriaresponsabilidades | Sim | 5- Colesterol        |
| 2017-09-25 | 63Rcf            | Feminino Casado(a)     | Ensino Superior |                             |                      | Entre 53 a 60 Simanos |                        | aposentadoriadivide e outros responsabilidades |                                       | Sim | 5- Colesterol        |
| 2017-10-01 | 70Ecs            | Feminino               |                 | com filho(s)                |                      | Entre 53 a 60 Simanos | idade                  | aposentadoriaresponsabilidades                 |                                       | Sim | 5- Colesterol        |
| 2017-05-05 | 61ABS            | Feminino Casado(a)     | Ensino Superior |                             | Do lar               |                       |                        | divide responsabilidades                       |                                       | Sim | 7- Dor, , 12- Outros |
| 2017-05-19 | 63RM             | Feminino Divorciado(a) | Ensino Superior | sozinho                     | Professor(a)         | Entre 53 a 60 Simanos |                        | aposentadoria                                  |                                       | Sim | 12- Outros           |
| 2017-09-30 | 61RB             | Feminino Casado(a)     | Ensino Superior |                             | Outros               | Entre 40 e 52 Simanos |                        | divide aposentadoriaresponsabilidades          |                                       | Sim | 12- Outros           |
| 2017-10-09 | 73m.m.a.g.f.     | Feminino Casado(a)     |                 |                             | Outros               | Acima de 60 Simanos   |                        | divide aposentadoriaresponsabilidades          |                                       | Sim | 12- Outros           |
| 2017-10-10 | 60J              | Feminino Casado(a)     |                 | com companheiro(a) e filhos | Outros               | Entre 53 a 60 Simanos |                        | divide aposentadoriaresponsabilidades          |                                       | Sim | 12- Outros           |
| 2017-10-13 | 70R. M.          | Feminino Casado(a)     | Ensino Superior |                             | Professor(a)         | Entre 53 a 60 Simanos | idade                  | divide aposentadoriaresponsabilidades          | Sim                                   | Sim | 12- Outros           |
| 2017-10-14 | 73MMLSMBEH       | Feminino Casado(a)     | Ensino Superior |                             | Professor(a)         | Entre 53 a 60 Simanos |                        | divide aposentadoriaresponsabilidades          |                                       | Sim | 12- Outros           |
| 2017-10-15 | 64LFM            | Feminino               | Ensino Superior | com parentes outros         | Do lar               |                       |                        | outros                                         |                                       | Sim | 12- Outros           |
| 2017-10-18 | 65S M S P        | Feminino Casado(a)     | Ensino Superior | com parentes outros         |                      | Entre 53 a 60 Simanos |                        | divide aposentadoriaresponsabilidades          |                                       | Sim | 12- Outros           |
| 2017-10-22 | 60MJFS           | Feminino Solteiro(a)   | Ensino Superior | sozinho                     |                      |                       |                        |                                                |                                       | Sim | 12- Outros           |
| 2017-10-23 | 75Bf             | Feminino               | Ensino Superior | sozinho                     |                      | Acima de 60 Simanos   |                        | outros divide responsabilidades                |                                       | Sim | 12- Outros           |
| 2017-11-12 | 64NSV            | Feminino Divorciado(a) |                 | com parentes outros         | Outros               | Entre 53 a 60 Simanos | idade                  | aposentadoriadivide e outros responsabilidades |                                       | Sim | 12- Outros           |
| 2017-11-12 | 62CSA            | Feminino Divorciado(a) |                 | com filho(s)                | Outros               |                       |                        | divide responsabilidades                       |                                       | Sim | 12- Outros           |
| 2017-11-16 | 61Mmf            | Feminino               | Ensino Superior | com filho(s)                | Outros               | Entre 40 e 52 Simanos |                        | divide aposentadoriaresponsabilidades          | Sim                                   | Sim | 12- Outros           |
| 2017-11-18 | 73Mgsa           | Feminino Casado(a)     | Ensino Superior |                             | Outros               | Entre 53 a 60 Simanos |                        | divide aposentadoriaresponsabilidades          |                                       | Sim | 12- Outros           |
| 2017-11-21 | 62M.T            | Feminino Divorciado(a) | Ensino Superior | sozinho                     | Professor(a)         | Acima de 60 Simanos   |                        | aposentadoria                                  |                                       | Sim | 12- Outros           |
| 2017-11-28 | 74MEMT           | Feminino Casado(a)     |                 | com companheiro(a) e filhos | Do lar               | Acima de 60 Simanos   | aposentadoria especial | divide aposentadoriaresponsabilidades          |                                       | Sim | 12- Outros           |
| 2017-11-29 | 74MEMT           | Feminino Casado(a)     |                 | com companheiro(a) e filhos | Do lar               | Acima de 60 Simanos   | aposentadoria especial | divide aposentadoriaresponsabilidades          |                                       | Sim | 12- Outros           |
| 2017-12-01 | 60AOS            | Feminino Casado(a)     | Ensino Superior | alugadafilhos               |                      |                       |                        | divide responsabilidades                       |                                       | Sim | 12- Outros           |
| 2018-02-09 | 66V              | Feminino Casado(a)     | Ensino Superior |                             | Outros               | Acima de 60 Simanos   |                        | aposentadoriadivide e outros responsabilidades |                                       | Sim | 12- Outros           |
| 2018-02-11 | 65ACBS           | Feminino Casado(a)     | Ensino Superior |                             | Professor(a)         | Acima de 60 Simanos   |                        | aposentadoria                                  |                                       | Sim | 12- Outros           |
| 2018-02-12 | 62IMF            | Feminino Divorciado(a) |                 | sozinho                     | Do lar               | Entre 53 a 60 Simanos | idade                  | aposentadoria                                  |                                       | Sim | 12- Outros           |
| 2018-02-13 | 61MD             | Feminino Solteiro(a)   | Ensino Superior | cedida com filho(s)         | Professor(a)         | Entre 53 a 60 Simanos |                        | aposentadoria                                  |                                       | Sim | 12- Outros           |
| 2018-02-13 | 75Fz             | Feminino               | Ensino Superior | sozinho                     | Professor(a)         | Entre 40 e 52 Simanos |                        |                                                |                                       | Sim | 12- Outros           |
| 2018-02-13 | 62MCZ            | Feminino               | Ensino Superior | alugadacom filho(s)         | Outros               | Entre 53 a 60 Simanos |                        |                                                | sim                                   | Sim | 12- Outros           |
| 2018-02-16 | 66DTC.           | Feminino               | Ensino Superior | sozinho                     | Outros               | Acima de 60 Simanos   | idade                  | aposentadoria                                  |                                       | Sim | 12- Outros           |
| 2018-02-21 | 64AN             | Feminino Solteiro(a)   | Ensino Superior | sozinho                     | Outros               | Entre 53 a 60 Simanos |                        | outros divide responsabilidades                |                                       | Sim | 12- Outros           |
| 2018-02-21 | 60E-E            | Feminino Divorciado(a) | Ensino Superior | sozinho                     | Outros               |                       |                        |                                                |                                       | Sim | 12- Outros           |
| 2018-02-25 | 60MRHZ           | Feminino Casado(a)     |                 |                             | Outros               | Entre 53 a 60 Simanos |                        | divide aposentadoriaresponsabilidades          | Sim                                   | Sim | 12- Outros           |
| 2018-02-28 | 67GMMS           | Feminino Solteiro(a)   | Ensino Superior | alugadasozinho              | Outros               | Entre 53 a 60 Simanos |                        | aposentadoria                                  |                                       | Sim | 12- Outros           |
| 2018-03-04 | 60B.O            | Feminino Divorciado(a) |                 | alugada                     | Outros               | Entre 53 a 60 Simanos |                        | divide aposentadoriaresponsabilidades          |                                       | Sim | 12- Outros           |
| 2018-03-04 | 69ES             | Feminino               |                 | sozinho                     |                      | Acima de 60 Simanos   | idade                  |                                                |                                       | Sim | 12- Outros           |
| 2018-03-04 | 64TCRP           | Feminino               | Ensino Superior | sozinho                     | Profissional liberal |                       |                        |                                                |                                       | Sim | 12- Outros           |



|            |           |           |               |                 |                                     |                            |                       |        |                                          |     |            |
|------------|-----------|-----------|---------------|-----------------|-------------------------------------|----------------------------|-----------------------|--------|------------------------------------------|-----|------------|
| 2018-03-06 | 61Jaeh    | Masculino | Casado(a)     | Ensino Superior |                                     | Professor(a)               | Entre 53 a 60 anos    |        | apostentadoria e outros                  | Sim | 12- Outros |
| 2018-03-07 | 62M       | Feminino  | Casado(a)     | Ensino Superior |                                     | Professor(a)               | Entre 53 a 60 Simanos |        | divide aposentadoriaresponsabilidades    | Sim | 12- Outros |
| 2018-03-11 | 74ITC     | Feminino  | Casado(a)     | Ensino Superior |                                     | Outros                     | Entre 40 e 52 Simanos |        | divide aposentadoriaresponsabilidades    | Sim | 12- Outros |
| 2018-03-12 | 75MES     | Feminino  | Casado(a)     | Ensino Superior |                                     | Professor(a)               | Entre 53 a 60 Simanos |        | divide aposentadoriaresponsabilidades    | Sim | 12- Outros |
| 2018-03-13 | 63RL      | Feminino  | Divorciado(a) |                 | alugadacom filho(s)                 | Outros                     | Entre 53 a 60 Simanos | outros | apostentadoria                           | Sim | 12- Outros |
| 2018-03-14 | 64Mim     | Feminino  |               | Ensino Superior | sozinho                             | Professor(a)               | Entre 40 e 52 Simanos |        | apostentadoria                           | Sim | 12- Outros |
| 2018-03-15 | 62M       | Feminino  | Divorciado(a) | Ensino Superior | com filho(s)                        | Outros                     | Entre 53 a 60 Simanos | outros |                                          | Sim | 12- Outros |
| 2018-03-18 | 60VS      | Feminino  | Casado(a)     |                 |                                     | Professor(a)               | Entre 53 a 60 Simanos | idade  | divide aposentadoriaresponsabilidades    | Sim | 12- Outros |
| 2018-03-19 | 65MFPB    | Feminino  |               | Ensino Superior | sozinho                             |                            |                       |        |                                          | Sim | 12- Outros |
| 2017-04-29 | 70T G     | Feminino  |               |                 | sozinho com companheiro(a) e filhos | Professor(a)               | Acima de 60 Simanos   |        | apostentadoria                           |     |            |
| 2017-05-05 | 64IHR     | Feminino  | Casado(a)     | Ensino Superior |                                     | Professor(a)               | Entre 40 e 52 Simanos |        | divide aposentadoriadesresponsabilidades | sim |            |
| 2017-05-07 | 64GAT     | Feminino  |               | Ensino Superior | sozinho                             | Outros                     | Entre 53 a 60 Simanos |        | apostentadoria                           |     |            |
| 2017-05-15 | 74hmgr    | Feminino  | Casado(a)     | Ensino Superior |                                     | Professor(a)               | Entre 40 e 52 Simanos |        | divide aposentadoriadesresponsabilidades |     |            |
| 2017-05-17 | 65VLA     | Feminino  | Casado(a)     | Ensino Superior | com companheiro(a) e outros         |                            |                       |        |                                          |     |            |
| 2017-05-18 | 61sim     | Feminino  |               |                 |                                     | Outros                     | Entre 40 e 52 Simanos |        | apostentadoria                           |     |            |
| 2017-10-06 | 77THG     | Feminino  | Casado(a)     | Ensino Superior |                                     | Professor(a)               | Entre 53 a 60 Simanos |        | divide aposentadoriadesresponsabilidades |     |            |
| 2017-10-07 | 63SMC     | Feminino  |               |                 | alugadacom filho(s)                 | Do lar                     |                       |        | outros                                   |     |            |
| 2017-10-12 | 69MSSS    | Feminino  | Casado(a)     | Ensino Superior |                                     | Professor(a)               | Entre 40 e 52 Simanos |        | apostentadoria                           |     |            |
| 2017-10-12 | 62Emjr    | Feminino  | Casado(a)     | Ensino Superior |                                     | Professor(a)               |                       |        | divide aposentadoriadesresponsabilidades |     |            |
| 2017-10-14 | 60MGAM    | Feminino  | Casado(a)     |                 | com parentes outros                 |                            |                       |        | divide aposentadoriadesresponsabilidades |     |            |
| 2017-10-15 | 61ETM     | Feminino  | Solteiro(a)   | Ensino Superior | alugadasozinho                      | Outros                     | Entre 53 a 60 Simanos |        | apostentadoria                           | sim |            |
| 2017-10-20 | 69V R H V | Feminino  | Casado(a)     | Ensino Superior |                                     | Professor(a)               | Entre 40 e 52 Simanos |        | apostentadoria e outros                  |     |            |
| 2017-10-20 | 73D O     | Feminino  | Divorciado(a) | Ensino Superior | alugadacom filho(s)                 | Financeiro/ Administrativo |                       |        | divide aposentadoriadesresponsabilidades |     |            |
| 2017-10-22 | 61E N     | Feminino  | Casado(a)     |                 | com companheiro(a) e filhos         | Outros                     |                       |        | divide aposentadoriadesresponsabilidades |     |            |
| 2017-10-23 | 64V LM    | Feminino  | Casado(a)     |                 | com companheiro(a) e filhos         | Professor(a)               | Entre 40 e 52 Simanos |        | divide aposentadoriadesresponsabilidades |     |            |
| 2017-10-23 | 65JDN     | Masculino |               | Ensino Superior | sozinho                             | Financeiro/ Administrativo | Entre 53 a 60 Simanos |        | apostentadoria                           |     |            |
| 2017-10-23 | 60AESQ    | Feminino  | Casado(a)     | Ensino Superior |                                     | Outros                     | Entre 53 a 60 Simanos | idade  | divide aposentadoriadesresponsabilidades |     |            |
| 2017-10-24 | 66PPB     | Masculino | Casado(a)     | Ensino Superior | alugada                             | Outros                     | Entre 40 e 52 Simanos |        | apostentadoria                           |     |            |
| 2017-11-12 | 67I c     | Feminino  |               |                 | com filho(s)                        | Profissional liberal       | Entre 53 a 60 Simanos | idade  | apostentadoria                           |     |            |
| 2017-11-12 | 65Ilza    | Feminino  |               | Ensino Superior | com parentes outros                 | Outros                     | Acima de 60 Simanos   |        | apostentadoriadesresponsabilidades       |     |            |
| 2017-11-13 | 60GR      | Feminino  | Divorciado(a) |                 | com parentes outros                 | Outros                     | Entre 53 a 60 Simanos |        | divide aposentadoriadesresponsabilidades |     |            |
| 2017-11-13 | 60SM      | Feminino  | Solteiro(a)   | Ensino Superior | alugadasozinho                      | Engenheiro(a)              | Entre 53 a 60 Simanos |        | apostentadoria                           |     |            |
| 2017-11-13 | 71METB    | Feminino  | Casado(a)     | Ensino Superior |                                     | Professor(a)               | Entre 40 e 52 Simanos |        | divide aposentadoriadesresponsabilidades |     |            |
| 2017-11-15 | 68MQAA    | Feminino  | Casado(a)     |                 | com companheiro(a) e filhos         | Professor(a)               | Entre 40 e 52 Simanos |        | divide aposentadoriadesresponsabilidades |     |            |
| 2017-11-20 | 65SPS     | Feminino  | Divorciado(a) | Ensino Superior | alugadasozinho                      | Profissional liberal       | Acima de 60 Simanos   |        | apostentadoria                           | sim |            |
| 2017-11-21 | 65AL      | Feminino  | Divorciado(a) | Ensino Superior | sozinho                             | Do lar                     |                       |        | outros                                   |     |            |
| 2017-11-22 | 69TMGS    | Feminino  | Casado(a)     |                 |                                     | Professor(a)               | Entre 53 a 60 Simanos |        | divide aposentadoriadesresponsabilidades |     |            |
| 2017-11-26 | 61WJF     | Feminino  | Casado(a)     |                 | com companheiro(a) e filhos         | Outros                     |                       |        | outros                                   |     |            |
| 2017-12-03 | 67J.M.M.  | Feminino  | Solteiro(a)   |                 | sozinho                             | Outros                     | Entre 40 e 52 Simanos |        | apostentadoria                           | sim |            |
| 2017-12-03 | 61c       | Feminino  | Casado(a)     |                 | sozinho                             | Professor(a)               | Entre 53 a 60 Simanos |        | apostentadoria e outros                  |     |            |

|            |            |                        |                 |                                                                     |                            |                       |                        |                                                |  |     |
|------------|------------|------------------------|-----------------|---------------------------------------------------------------------|----------------------------|-----------------------|------------------------|------------------------------------------------|--|-----|
| 2018-02-09 | 69M.E      | Feminino Casado(a)     | Ensino Superior | com companheiro(a) e filhos                                         | Do lar                     | Acima de 60 Simanos   | idade                  | outros                                         |  |     |
| 2018-02-10 | 79MPB      | Feminino Solteiro(a)   | Ensino Superior | alugadasozinho                                                      | Professor(a)               | Acima de 60 Simanos   |                        | aposentadoria                                  |  |     |
| 2018-02-10 | 69GMO      | Feminino Divorciado(a) | Ensino Superior | alugadasozinho                                                      | Professor(a)               | Entre 53 a 60 Simanos |                        | divide aposentadoriaresponsabilidades          |  | sim |
| 2018-02-14 | 62A M C    | Feminino Divorciado(a) | Ensino Superior | alugadasozinho                                                      | Professor(a)               |                       |                        |                                                |  |     |
| 2018-02-15 | 74C C G    | Feminino Divorciado(a) | Ensino Superior | sozinho                                                             | Professor(a)               | Entre 53 a 60 Simanos |                        | aposentadoria                                  |  |     |
| 2018-02-15 | 60MC       | Feminino Solteiro(a)   | Ensino Superior | com parentes alugadaoutros                                          | Professor(a)               | Entre 53 a 60 Simanos | idade                  | aposentadoriadivide e outros responsabilidades |  | sim |
| 2018-02-16 | 62SI       | Feminino               | Ensino Superior | sozinho                                                             | Outros                     | Entre 53 a 60 Simanos |                        | aposentadoria                                  |  | sim |
| 2018-02-20 | 69RMP      | Masculino              | Ensino Superior | sozinho                                                             | Outros                     | Entre 53 a 60 Simanos |                        | aposentadoria                                  |  |     |
| 2018-02-23 | 71AKF      | MasculinoCasado(a)     | Ensino Superior |                                                                     | Outros                     | Entre 40 e 52 Simanos | aposentadoria especial | aposentadoria                                  |  |     |
| 2018-02-24 | 70MILP     | Feminino Casado(a)     | Ensino Superior |                                                                     | Outros                     | Entre 53 a 60 Simanos |                        | aposentadoria                                  |  |     |
| 2018-02-25 | 62NA       | Feminino Casado(a)     | Ensino Superior |                                                                     | Professor(a)               | Entre 40 e 52 Simanos |                        | aposentadoria                                  |  |     |
| 2018-03-04 | 60NC       | Feminino Divorciado(a) | Ensino Superior | sozinho                                                             |                            |                       |                        |                                                |  |     |
| 2018-03-04 | 67V        | Feminino Casado(a)     | Ensino Superior |                                                                     | Professor(a)               | Acima de 60 Simanos   | idade                  | divide aposentadoriaresponsabilidades          |  |     |
| 2018-03-05 | 65A L L    | Feminino Divorciado(a) |                 | sozinho                                                             | Do lar                     |                       |                        |                                                |  |     |
| 2018-03-06 | 69ESC      | Feminino Casado(a)     | Ensino Superior |                                                                     | Professor(a)               |                       |                        | divide responsabilidades                       |  |     |
| 2018-03-06 | 63RVL      | Feminino Solteiro(a)   | Ensino Superior | com filho(s)                                                        | Professor(a)               |                       |                        |                                                |  |     |
| 2018-03-08 | 60NC       | Feminino               | Ensino Superior | sozinho                                                             | Profissional liberal       |                       |                        |                                                |  |     |
| 2018-03-08 | 62Cm       | MasculinoCasado(a)     |                 | outros                                                              | Profissional liberal       |                       |                        |                                                |  |     |
| 2018-03-10 | 61IG       | Feminino Divorciado(a) | Ensino Superior | sozinho                                                             |                            |                       |                        | outros                                         |  |     |
| 2018-03-11 | 61M A      | Feminino Casado(a)     |                 | com parentes outros                                                 | Professor(a)               |                       |                        | divide responsabilidades                       |  |     |
| 2018-03-12 | 64AASR     | Feminino               |                 | alugadasozinho                                                      | Do lar                     |                       |                        | divide responsabilidades                       |  | sim |
| 2018-03-12 | 61GAM      | Feminino Solteiro(a)   | Ensino Superior | com parentes outros                                                 | Outros                     | Acima de 60 Simanos   |                        | divide aposentadoriaresponsabilidades          |  |     |
| 2018-03-15 | 74RMGS     | Feminino               |                 | cedida com filho(s)                                                 | Profissional liberal       | Acima de 60 Simanos   | idade                  | divide aposentadoriaresponsabilidades          |  |     |
| 2018-03-17 | 61R A S.   | Feminino               | Ensino Superior | com parentes outros com companheiro(a) e filhos                     | Professor(a)               | Acima de 60 Simanos   | idade                  | aposentadoria                                  |  | sim |
| 2018-03-10 | 60R.B.     | Feminino Casado(a)     |                 |                                                                     | Outros                     |                       |                        | divide responsabilidades                       |  | Sim |
| 2018-03-17 | 63RP       | Feminino Solteiro(a)   | Ensino Superior | com parentes outros                                                 | Outros                     | Entre 53 a 60 Simanos |                        | divide responsabilidades                       |  |     |
| 2018-03-17 | 61E M P    | Feminino Casado(a)     |                 |                                                                     |                            | Entre 53 a 60 Simanos | idade                  | aposentadoria                                  |  |     |
| 2018-03-18 | 60I A F    | Feminino Casado(a)     | Ensino Superior |                                                                     | Outros                     | Entre 53 a 60 Simanos |                        | divide aposentadoriaresponsabilidades          |  |     |
| 2018-03-19 | 66M J P C  | MasculinoCasado(a)     | Ensino Superior | com companheiro(a) e filhos                                         | Professor(a)               | Acima de 60 Simanos   |                        | divide aposentadoriaresponsabilidades          |  |     |
| 2018-03-21 | 65MC       | Feminino Solteiro(a)   | Ensino Superior | com filho(s)                                                        | Outros                     | Acima de 60 Simanos   | idade                  | aposentadoria                                  |  |     |
| 2018-03-22 | 68MC       | Feminino               | Ensino Superior | com filho(s)                                                        | Professor(a)               |                       |                        | outros                                         |  |     |
| 2018-03-22 | 63MABL     | Feminino Solteiro(a)   | Ensino Superior | com filho(s)                                                        | Professor(a)               |                       |                        | outros                                         |  |     |
| 2018-03-23 | 82N. F. K. | Feminino               |                 | sozinho                                                             | Do lar                     |                       |                        |                                                |  |     |
| 2018-03-23 | 62R        | Feminino Casado(a)     |                 | com companheiro(a) e filhos com companheiros(a), filho(s) e neto(s) | Do lar                     | Acima de 60 anos      | idade                  |                                                |  | sim |
| 2018-03-24 | 60Lmpm.    | Feminino Casado(a)     | Ensino Superior |                                                                     |                            |                       |                        |                                                |  |     |
| 2018-03-24 | 76B T      | Feminino               | Ensino Superior | sozinho                                                             | Do lar                     | Acima de 60 Simanos   | outros                 | aposentadoria                                  |  |     |
| 2017-09-28 | 60MFN      | Feminino Divorciado(a) | Ensino Superior | com filho(s)                                                        | Professor(a)               | Entre 53 a 60 Simanos |                        | aposentadoria e outros                         |  | sim |
| 2017-10-02 | 61SMFC     | Feminino Casado(a)     | Ensino Superior |                                                                     | Financeiro/ Administrativo | Entre 53 a 60 Simanos | idade                  | divide aposentadoriaresponsabilidades          |  | sim |

|            |         |           |                 |               |              |                      |                       |       |                      |                   |     |
|------------|---------|-----------|-----------------|---------------|--------------|----------------------|-----------------------|-------|----------------------|-------------------|-----|
| 2017-10-08 | 63FCG   | Feminino  | Ensino Superior | Divorciado(a) | com filho(s) | Do lar               | Acima de 60 Simanos   | idade | apostadoriadi        | responsabilidades |     |
| 2017-10-08 | 66R.P.  | Masculino | Casado(a)       |               |              | Profissional liberal |                       |       |                      |                   |     |
| 2017-05-04 | 62MFRO  | Feminino  | Casado(a)       |               | alugada      | Outros               |                       |       |                      |                   |     |
| 2017-09-25 | 60RGABM | Feminino  |                 |               | sozinho      | Professor(a)         | Entre 53 a 60 Simanos |       | apostadoria e outros |                   | Sim |
